# Supplementary material for: Evaluation of the Effectiveness of BOPPPS Combined with Scenario-Based Simulation in the Clinical Teaching of Operating Room Nursing Interns
Source: Research Square preprint supplement (doi:10.21203/rs.3.rs-6909666/v1), 2025-08-04
Supplement: Supplementary file 1 [file 1466647beea112e1fb6ae4f9.docx]

Table 5 Comparison of student satisfaction between the two groups regarding teaching methods [n (%)]

| | **Items** |  | | --- | --- | | **Control group (n = 36)** | **Experimental group (n = 35)** |
| --- | --- | --- | --- | --- |
|  | |  | Satisfied |  | | --- | --- | --- | | Neutral |
| Stimulating interest in learning | |  | 25 (69.4) | | --- | --- | | | 11 (30.6) | | --- | |
| Enhancing self-confidence in learning | |  | 24 (66.7) | | --- | --- | | | 12 (33.3) |  | | --- | --- | |
| Improving interpersonal communication skills | |  | 22 (61.1) | | --- | --- | | | 14 (38.9) | | --- | |
| Fostering teamwork | |  | 25 (69.4) |  | | --- | --- | --- | | 10 (27.8) |
| Promoting self-directed learning ability | |  | 20 (55.5) | | --- | --- | | | 15 (41.7) | | --- | |
| Enhancing ability to integrate knowledge for problem-solving | |  | 21 (58.3) | | --- | --- | | | 14 (38.9) | | --- | |
