# Supplementary figures and images for: Evaluation of the Effectiveness of BOPPPS Combined with Scenario-Based Simulation in the Clinical Teaching of Operating Room Nursing Interns
Source: Research Square preprint supplement (doi:10.21203/rs.3.rs-6909666/v1), 2025-08-04

Table 1 Steps of the BOPPPS teaching model combined with scenario-based simulation


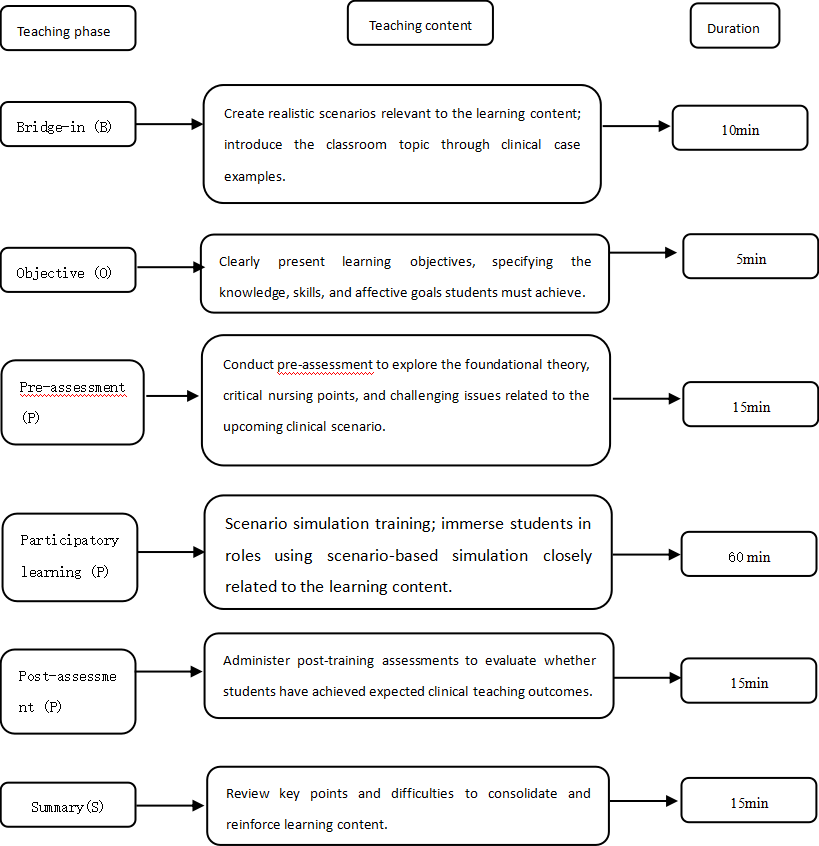

Supplement: Supplementary file 2 [file e8c2631aee1d273d5d834cc2.docx]
